1 Title: Learning for angling: an advanced learning capability for avoidance of angling gear in red  
2 sea bream juveniles

3

4 Authors Kohji Takahashi<sup>1,2</sup>, Reiji Masuda<sup>1</sup>

5

6 <sup>1</sup>Kyoto University Maizuru Fisheries Research Station

7 <sup>2</sup>present address Keio University

8

9 Abstract

10 Angling has been the cause of mortality for fish since ancient. The avoidance learning for angling  
11 gear could be considered as a survival strategy against the mortality by angling. Whereas some  
12 studies indicated the possibility of avoidance learning for angling gear, most studies investigated  
13 the avoidance learning by using groups of fish, in which it is difficult to reveal the process and  
14 mechanisms of the learning. The present study elucidated the avoidance learning for angling gear  
15 by experiment of single fish in a tank using red sea bream *Pagrus major* juveniles. Individuals  
16 with only once or twice of experience for angling avoided angling gear while showing the feeding  
17 motivation for pellets, representing avoidance learning for the angling gear. Most of the  
18 experienced individuals avoided the krill attached with a fishing line, but not krill and pellets near  
19 the angling gear. Feeding rate for prey on a fishing line at two month after the angling trial  
20 demonstrated that approximately half of fish kept the memory for angling gear. A series of  
21 experiment for angling gear elucidated that red sea bream juveniles are equipped with  
22 considerable learning capability for angling gear, suggesting a cognitive evolution for angling.

23

24 Keywords: angling, fishing, cognitive ecology, preparedness, learning

25

26 1. Introduction

27 Angling has been conducted as a major fishing method since ancient [1, 2]. Recent study indicated  
28 the evidence that hooks for angling had been made at the 35,000–30,000 years before present [3].  
29 Also, angling is one of popular leisure around the world. A study in Japan showed that one in  
30 eleven people enjoy angling as a leisure [4]. It is predicted that angling continues to be central in  
31 fishery societies and economies around the world.

32 On the other hand, the hooking and capturing during angling process is a matter of life  
33 and death for fish. Some studies showed the evidence that angling leads to the mortality of fish  
34 [5-7]. Even if an angling does not lead to death for fish, the angled fish would suffer from the  
35 physiological damage, behavioral change and stress by the angling [8-10]. For example, large  
36 mouth bass changed the nest site for parental care by multiple times of angled experiences [11].  
37 Line fishing would accelerate the natural selection for fish which is targeted by fishing [12], and  
38 thus they should equip the capability to avoid angling gear efficiently.

39 The avoidance learning for angling gear is considered as a survival strategy against the  
40 angling, because fish should acquire the information of angling gear as a dangerous subject in  
41 fishing ground where they frequently encounter angling gears. Past studies suggested that fish  
42 can avoid the angling gear through the experience being angled [13-16]. Some studies showed  
43 that the angling rate in a natural condition and fish pond is declined over time with angling [17-  
44 20]. However, most of the past studies had investigated the avoidance learning for angling by  
45 experiment using groups of fish in a large scale, e.g., ponds or large experimental tanks. There  
46 are some problems to elucidate the learning of angling gear in such a scale of experiment. For  
47 example, the feeding motivation should be confirmed for an individual avoiding the angling gear,  
48 because the motivation may be lowered by the stress from angling experience for not only angling  
49 gear but also prey itself [21,22]. Also, aversive experience often enhances the alertness of fish  
50 [23]. If an individual to be angled enhances the alertness, the fish would be less vulnerable to  
51 angling than naive fish, because bold fish often feed more aggressively than fish being cautious  
52 [15,24]. Conversely, the competition with conspecific mates often prompts their feeding  
53 motivations within a shoal [25,26]. Thus, fish may feed the angling gear in a group even though  
54 they had learned the angling gear as a dangerous subject.

55 In particular, it is unclear for the performance and mechanism of avoidance learning for  
56 angling gear, because it is difficult to elucidate these factors by experiments using groups of fish.  
57 Animals should recognize appropriately and quickly essential information to survive, and they  
58 often equip the cognitive ability fitted to the ecology [27, 28]. Learning performance for angling  
59 should be evaluated in consideration of learning process and retention in individual basis, i.e.,  
60 how many times of angling experience are required to learn the avoidance of angling gear, and  
61 also how long it is retained on the memory for angling. Also, a pattern of an associative learning

62 often depends on environmental factor they originate [29-32]. To understand the mechanism of  
63 learning for angling, it is important how fish learn the angling gear as an aversive object.

64 The present study investigated the avoidance learning for angling gear by using red sea  
65 bream *Pagrus major* juveniles. The species is one of the most important fishes for fisheries in  
66 Japan, and hatchery-reared fish are available from commercial fish farms. The experiment was  
67 conducted by a singular fish in experimental tanks to eliminate the effect of group. First, the  
68 learning process and the retention of learned information for short period were investigated by  
69 presentations of angling gear on consecutive 28 days. Second, we investigated what is the key of  
70 avoidance learning by presenting angling gear separately. Third, we compared the angling rate  
71 between experienced and control fish, which had never been angled, by blind test. Thereby, we  
72 evaluated the effect of the learning for the avoidance of angling gear. Finally, the long term  
73 retention of learned information was tested for each individual.

74

## 75 2. Material and methods

### 76 (a) Materials

77 Twenty two hatchery reared red sea bream juveniles were used for experiment (details in electrical  
78 supplemental material). Eleven blue polypropylene containers (width 45 × length 66 × depth  
79 33cm, depth 25 cm) were used for the experimental tank (details in electrical supplemental  
80 material). A fish was introduced in each tank, and each fish was acclimatized over three days with  
81 feeding cycle in the morning (7:00-10:00) and evening (14:00-17:00) everyday. The experiment  
82 was initiated when the fish foraged pellets within 30 s after feeding in the morning.

83

### 84 (b) Experiment 1: the process of learning for angling gear

85 An experimental trial consisted of a feeding motivation test and a presentation trial. The feeding  
86 motivation was confirmed by providing pellets (three to four pellets), and when the fish ate the  
87 pellets within 30 s, a presentation trial was immediately conducted. By confirming the feeding of  
88 pellets before presenting angling gear for each trial, we evaluated whether the fish would avoid  
89 the angling gear while having the motivation of feeding.

90 Individuals were divided into either of angling treatment and control (11 fish was used for  
91 each treatment). Angling treatment fish was presented with the angling gear (details in electrical  
92 supplemental information), and the feeding behavior for a krill attached with the angling gear was  
93 observed for up to a maximum of 60 s. When fish took a krill with hook into the mouth, the fish  
94 was quickly captured out of the water through the angling leader, i.e., the fish was angled. The  
95 angled fish was kept in air for at least 30 sec, and then returned to the experiment tank after  
96 removing the hook with the snout. When it was difficult to remove the hook from mouth, the  
97 leader was cut; i.e., the hook was remained in mouth of the fish, but it did not affected feeding

98 motivation of fish. If fish did not feed a krill for 60 s, the presentation trial was ended as "no  
99 angling". Also, biting times, i.e., the number of time that fish pecked the krill without intake by  
100 mouth, were counted during the observation period. When the fish took the krill away without  
101 being hooked during the observation, another krill was attached with the angling gear. Control  
102 fish was provided with a gear of which hook end was cut by pliers; thus, they could feed a krill  
103 attached with the gear without being hooked. An experiment trial for each treatment was  
104 conducted during daytime before noon (7:00-11:00). To reduce the variability of hunger level for  
105 each individual, sufficient pellets were fed for both angling and control fish every afternoon  
106 (15:00-18:00). The experimental trial was repeated for consecutive 28 days. The experiment was  
107 replicated for two cycles (1st cycle: angling treatment, n=6, control, n=5; 2nd cycle, angling  
108 treatment, n=5, control n=6).

109 We analyzed the effect of angling treatment for feeding behavior ("fed (including biting  
110 without hooking)" or "not") by generalized linear mixed model (GLMM) with the "lme4" package  
111 [33] for R statistical software. The error distributions of the response variables were fitted to the  
112 binomial distribution, using restricted maximum likelihood parameter estimation. The fixed  
113 factors were "treatment (angling or control)", "trial (1-28 trials)", and "interaction (treatment ×  
114 trial)", whereas "individual" was treated as a random factor because the feeding behavior of each  
115 individual was repeatedly measured during 28 trials. To evaluate the behavioral change of angling  
116 treatment, the angling and feeding of only angling treatment fish was fitted to GLMMs (variable  
117 factor: angling: "angled" or "not", feeding behavior: "fed" or "not", fixed factor for each variable  
118 factor: "trial", random factor: "individual", error distribution: binomial). Biting time was also  
119 fitted to GLMM with the error distribution of Poisson (fixed factor: "trial"). To evaluate the  
120 feeding behavior while avoiding angling, angling rate focused on only the fish which showed the  
121 feeding behavior for angling gear was also fitted to GLMM (fixed factor: "trial", error  
122 distribution: binomial). We used the Wald test to evaluate the effect of the fixed factors for each  
123 model.

124 The learning performance was investigated for each individual in the angling treatment.  
125 When a fish avoided the angling even though it fed on pellets in the motivation test, the fish was  
126 considered as leaned. The trials to be required until the learning was investigated for each  
127 individual. After the learning, the retention of the learned information was evaluated by days to  
128 be re-angled as a short duration memory.

129

130 (c) Experiment 2: the mechanism of learning for angling gear

131 Each individual was tested to investigate what of the angling gear was avoided by the learned fish  
132 after one hour of the Experiment 1. In the test, both of angling and control treatment fish were  
133 provided with following angling gears: "pellets and angling gear", "krill with the line", and "krill"

134 (electronic supplemental material, figure 2a). The "pellets and angling gear" without krill was  
135 presented to evaluate the decrease of the feeding motivation of fish by providing the angling gear.  
136 In the "krill with the line" test, an angling gear was presented with a krill attached on a line without  
137 a hook: i.e., the same gear as one of control treatment. The "krill" test was the presentation of a  
138 krill without angling gear to confirm the avoidance for prey itself. The feeding motivation for  
139 pellets was confirmed just before each test. These presentation tests were conducted sequentially  
140 for each individual to reduce the number of fish used in the experiment. The order of presentation  
141 test was fixed to decrease the effect of previous test. Each presentation test lasted for 60 s or until  
142 fish foraged the pellets or krill. The feeding rate for each presentation was compared between  
143 treatments and among presentation tests in each treatment by Fisher's exact test. The latency to  
144 feed was measured for each test, and compared between treatments by Student's *t*-test .

145

146 (d) Experiment 3: the effect of learning for angling gear

147 At one hour after the end of the Experiment 2, the angling test was blindly conducted by third  
148 persons who were not informed about the experiment information. The blind tests were conducted  
149 by eight participants in total. In the test, the angling gear attached with a hook and krill was  
150 presented for 60 sec in the same manner as presentation trial of angling treatment in experiment  
151 1. The feeding behavior was observed during the test, and then the latency until angling was  
152 measured if the fish was hooked. The angling rate was compared between angling and control  
153 treatment by Fisher's exact test, and the odds ratio of angling for angling treatment was estimated  
154 against control. The fish was then captured after the test, transferred into the beaker, and was  
155 photographed to measure the body length using Image J software (Open Source, Public Domain,  
156 NIH). We confirmed that there was no difference of body length between treatments (angling  
157 treatment,  $117.8 \pm 8.8$ mm (mean $\pm$ standard deviation); control,  $118.8 \pm 12.6$  mm; Student's *t*-test,  
158  $t_{1,20} = -0.19$   $p > 0.84$ ). Then, individuals of angling treatment were introduced into rearing tanks  
159 (200L transparent circular tank) for each experimental cycle, and they were reared in the same  
160 manner as the stock tank until Experiment 4.

161

162 (e) Experiment 4: the long term retention of learning for angling gear

163 At about two month (87-98 days) after the Experiment 3, the retention of learning for angling  
164 gear was investigated for each individual of angling treatment fish ( $n=10$ , because a fish of 2nd  
165 cycle died before the test). On the day before testing, a fish was introduced in an experimental  
166 tank to be acclimatized for a night. After a night, each fish was tested by presentation of "pellets  
167 and angling gear" and "krill with the line" in the same manner as in the Experiment 2; the feeding  
168 motivation for pellets was confirmed before each presentation. The feeding rate was compared  
169 between presentation tests by Fishes' exact test.

170

171 Results

172 (a) Experiment 1: the process of learning for angling gear

173 All the fish, both angling treatment and control, accepted the presented pellets in the feeding  
174 motivation test. Thus, lack of feeding with the presence of angling gear on a presentation trial  
175 was considered as avoidance learning for angling gear, but not by loss of feeding motivation.

176 For the feeding behavior in both treatments, there were significant effects of treatment,  
177 trial, and interaction (treatment  $\times$  trial) in the GLMM analysis (all factors  $P < 0.001$ ; figure 1 &  
178 electronic supplemental material, table S1a). For the angling treatment fish, there was a significant  
179 effect of trial in each GLMM (feeding behavior  $P < 0.01$ , angling  $P < 0.001$ , biting times  $P < 0.05$ ,  
180 electronic supplemental material, figure S2,3 & table S1b). Evaluating the angling of fish  
181 representing feeding, there was a significant effect of trial for angling rate (table 1c,  $P < 0.001$ ;  
182 electronic supplemental material, figure S4 & table S1c).

183

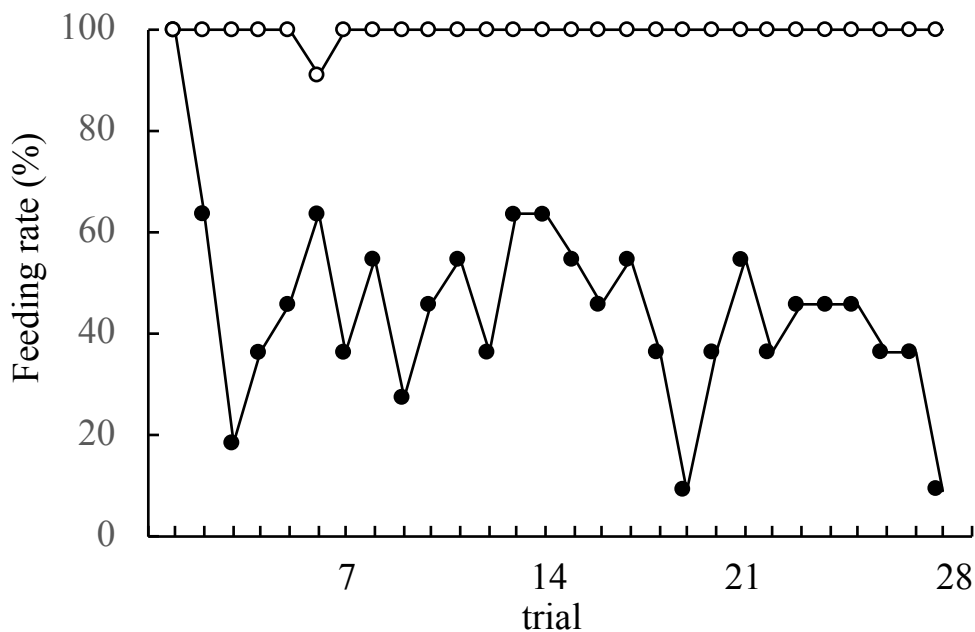

184

185 Fig1 The feeding rate of fish in the control (open circle) and angling (closed circle) treatment  
186 during the 28 trials in Experiment 1

187 For individual analysis of angling treatment, all individuals avoided the angling gear  
188 after one ( $n=5$ ) or two angling trials ( $n=6$ ); i.e., fish required  $1.6 \pm 0.5$  (mean  $\pm$  standard deviation)  
189 trial to learn the avoidance of angling gear. Meanwhile, all fish was re-angled within 13 days after  
190 the avoidance learning (electronic supplemental material, fig s5), and then  $4.3 \pm 3.3$  days were  
191 required until next angling. Times of angling during 28 days varied from three to eight among  
192 individuals.

193

194 (b) Experiment 2: the mechanism of avoidance learning for angling gear

195 Angling treatment fish showed the feeding rate of 100 % (11/11 individuals) for “pellets and  
196 angling gear”, 9.1 % (1/11) for “krill with the line”, and 100 % (11/11) for "krill", respectively  
197 (figure 2b). The feeding rate of control fish was 100 % (11/11) for all the presentation test. The  
198 feeding rate of "krill with the line" for angling treatment was significantly lowered than control  
199 treatments ( $P < 0.001$ ), but not different from others ( $P = 1.00$ ). For angling treatment fish, the  
200 feeding rate of "krill with the line" was significantly lower than other presentation ( $P < 0.001$ ).  
201 There was no difference of feeding rate among presentation tests in control ( $P = 1.00$ ). The latency  
202 to feed "krill with the line" of control was faster than the fish (11 sec) of angling treatment (one-  
203 sample  $t$ -test,  $t_{1,10} = -19.53$ ,  $P < 0.001$ ; electronic supplemental material, fig s6). Meanwhile, there  
204 was no difference of the feeding latency between treatments for "pellets and angling gear" and  
205 "krill" ("pellets and angling gear":  $t_{1,20} = -1.33$ ,  $P < 0.20$ , "krill":  $t_{1,20} = -1.04$ ,  $P < 0.31$ ).

206 (a)

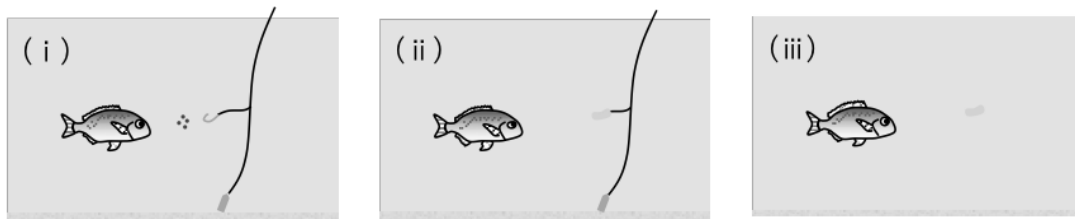

207

208 (b)

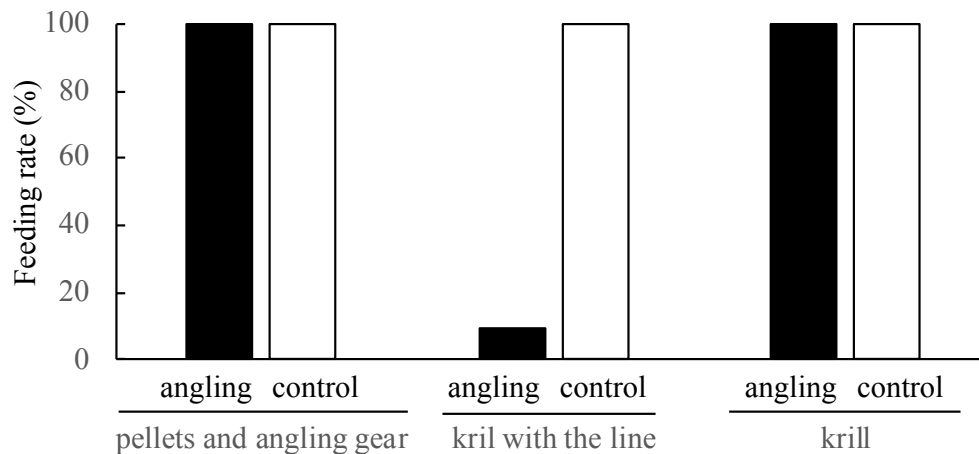

209

210 Fig2 (a) Schematic illustrations of test presentation in experiment 2: (i) pellets and angling gear,  
211 (ii) krill with the line, and (iii) krill. (b) The feeding rate of fish in the angling (black column) and  
212 control (white column) treatment when three types of gears or prey were presented in Experiment  
213 2

214 (c) Experiment 3: the effect of learning for angling gear

215 The angling rate in blind test was 18.2% (2/11) for angling treatment and 81.82 % (9/11) for



216 control, respectively, and there was a significant difference of angling rate between the treatments  
217 ( $P < 0.01$ ). The latency for angling was 18s and 52s for angling treatment, and  $9.4 \pm 10.2$ s for  
218 control, respectively, and there was a significant difference between treatments (one-sample  $t$ -test  
219 “control vs 18s”;  $t_{1,8} = -2.37$ ,  $P < 0.05$ ). The cause of not being captured in angling treatment was  
220 either they did not feed at all (in two individuals) or showed only biting (in other seven  
221 individuals). For control fish, two fish showed the biting for the angling gear but were not  
222 captured. The odds ratio for angled fish in the angling treatment was 0.05 against control.

223

224 (d) Experiment 4: long term retention of learning for angling gear

225 The feeding rate was 100 % (10/10) with the presentation of "pellets and angling gear" and 50%  
226 (5/10) with that of "krill with the line". The foraging rate of "krill with the line" was significantly  
227 lower than "pellets and angling gear" on the two month later test ( $P < 0.04$ ).

228

229 Discussion

230 All individuals including both treatments of angling and control fed the krill attached with angling  
231 gear and were angled on the first trial. Meanwhile, angling treatment fish decreased to feed from  
232 the angling gear with the experience of angling, although they had always demonstrated the active  
233 feeding on the pellets in the motivation tests prior to the angling trial. This result suggests that the  
234 fish recognized the angling gear as an object to avoid feeding through the experience of angling;  
235 i.e., avoidance learning for angling gear. Whereas past studies using groups of fish suggested the  
236 avoidance learning for angling gears [13-16], these studies have not confirmed the feeding  
237 motivation of fish during experiment. The present study verified the avoidance learning for  
238 angling gear to elucidate the fact that fish desired prey at the presentation of angling gear.

239 The angling rate in the angling treatment decreased during 28 days, suggesting that  
240 learning progressed gradually as the experience of angling. The major factor for the decrease of  
241 angling would be the refusing to feed from the angling gear, because the feeding rate also decrease  
242 with trials during angling treatment. Meanwhile, the feeding for angling gear was maintained to  
243 a certain extent even after the learning progressed. Or rather, biting times, i.e., pecking krill  
244 attached with the angling gear without being hooked, had increased during learning process. This  
245 means that fish getting experience of angling might become not only to avoid angling gear, but  
246 also to steel prey on the angling gear without being hooked. In fact, the angling rate regarding  
247 only feeding fish decreased remarkably with trials. The present study indicates that red sea bream  
248 juveniles improve the feeding behavior of angling gear while avoiding to be angled. Improvement  
249 of feeding skill is found in fishes [34, 35]; e.g., the shooting accuracy in archer fish was improved  
250 rapidly through the experience of target movement [36]. However, in our knowledge, present  
251 study is the first to have elucidated the improvement of feeding for angling gear.

252 All individuals of angling treatment learned to avoid angling gear through only once or  
253 twice experience of angling. Red sea bream juveniles were able to quickly learn the angling gear  
254 as a dangerous object. Similarly, past studies suggested that the fish can learn angling gear by  
255 only a few times of angling experience [14,15]. For example, Beukma [37] found in carp by an  
256 experiment on artificial lake that many individuals became invulnerable to angling once being  
257 angled; however, this study could not rule out the possibility of reduced feeding motivation.  
258 Avoidance learning for angling gear may be a simple task for fish, at least for some species which  
259 are subject to angling. Essential information in an ecology is often learned rapidly with only a  
260 few experience in fishes [38, 39]. For example, predator information is learned by a single  
261 conditioning [40]. Shanny, which form the nest in rock tide pool, can learn the location of shelter  
262 with only one trial [41]. The remarkable cognitive ability for angling gear in red sea bream implies  
263 that the learning for angling gear is important in their ecology.

264 Although angling treatment fish quickly learned to avoid angling gear, all individuals  
265 were re-captured after the learning; 4.3 days on average were required to be re-angled. This means  
266 that by no means fish can avoid completely the angling gear after the learning of angling. Fish  
267 may be angled in a place where anglers are abundant, such as a major fishing ground or fishing  
268 pond, even if the fish can quickly learn the angling gear as dangerous subject. Some studies have  
269 shown the re-angling of fish that had previously experienced angling [42, 43]. For example,  
270 Tsuboi & Morita [44] using white-spotted charr found that some of fish were angled repeatedly  
271 during research period. The study also showed that the fish with a greater experience of being  
272 angled were more angled; that is, there were individual variations of learning for angling. In the  
273 present study, angling times varied among individuals of angling treatment, and some fish were  
274 vulnerable to angling. In the following experiment of the present study, the vulnerability of  
275 angling is related to the boldness of individuals (Takahashi, unpublished); i.e., bold fish were  
276 angled more frequently than shy ones. The individual difference of learning should be  
277 investigated in more detail. On the other hand in the present study, the fish is confined in a small  
278 tank, and then they were obliged to be encountered with angling gear after the learning. Thus,  
279 they might have fed the prey on the angling gear knowing that it was dangerous; the increased  
280 biting times of angling gear during angling trials supports this speculation.

281 Although angling treatment fish was re-angled in a few days after the fish had once  
282 learned angling (Experiment 1), the fish developed the cognition for angling by repeated  
283 presentation of angling gear. At two months after the 28 consecutive angling presentations,  
284 approximately a half of angling treatment fish avoided a krill attached with a line (experiment 4).  
285 This suggests that the angling treatment fish, at least a part of them, retained the learning for  
286 angling gear even if they had not encountered the angling gear for this period. Similar suggestions  
287 of long term memory for angling are also found in experiment which was conducted in a large

288 pond [37]; the experiment suggests that fish kept the memory of being hooked for at least a year.  
289 The present study has verified the long term memory of avoidance learning for angling gear by a  
290 small scale experiment. Retention of learned information can be often related to the ecology of  
291 animal. For example, food-storing birds have better spatial memory than birds that do not store  
292 food [45]. In fish, the retention of information for predator is shaped by individual growth rate as  
293 a behavioral tactics [46]. For memory retention of red sea bream, Kaneko [47] showed that most  
294 fish were not able to retain the learned information of feeding area for 60 days. It might be  
295 important for red sea bream to keep the information of angling gear for a long term, because they  
296 would often encounter the angling gear in their lives after the learning for angling.

297 In Experiment 2, all of learned fish fed pellets under the presence of angling gear. It is  
298 expected that the feeding motivation was not lowered by the vigilance against the presence of  
299 angling gear. Also, all fish fed a krill without the line and hook. Some study found that fish avoid  
300 prey containing aversive substance, such as toxic or unpalatable food [48,49]. However, the fish  
301 in the present study did not recognize the krill itself as a prey which should be avoided. The result  
302 indicates that the avoidance learning for the angling gear is regarded as distinct from food  
303 aversion learning. Aversion learning for prey is often affected by combination between  
304 conditioned stimulus and unconditioned stimulus; for a classical example of rat, the aversion for  
305 prey can be conditioned with lithium chloride, but not with electrical shock [50]. The aversion  
306 learning for angling in the present study would be difficult to be associated with prey itself in red  
307 sea bream.

308 Meanwhile, almost all fish of the angling treatment avoided to feed a krill with a line;  
309 the feeding latency of a feeding fish was longer than control feeding fish. This means that red sea  
310 bream juveniles evaluated the risk of angling gear with the presence of fishing line attached with  
311 a prey. Whereas past studies suggested that fish can avoid angling gears through a learning effect,  
312 the mechanisms have not been clear [16]. The experiment elucidated that a prey attached with a  
313 fishing line is the key factor of the learning for angling gear. The result in experiment 2 indicates  
314 that they could feed a prey they had once eaten in angling process unless the prey is attached with  
315 a fishing line. Angled fish are often returned to fishing ground, either being released intentionally  
316 by angles or the fish being able to escape during the angling process. The fish after the release  
317 must avoid a prey which lead to be angled, because repeated angling would increase the risk of  
318 mortality [5-7]. However, while avoiding the dangerous prey, the fish need to take prey for their  
319 lives. If fish learn to avoid the prey itself previously angled, such as food aversion learning, the  
320 fish would lose a chance to get the prey even when the prey is safe without angling line. It would  
321 be essential to take a prey discriminating correctly whether the prey is dangerous. The making  
322 decision of feeding a prey, i.e., estimating a presence of angling line, must be useful for fish to  
323 survive in a fishing ground.

324 In the blind test after the angling treatment (experiment 3), the angling rate of angling  
325 treatment fish was remarkably lower than control fish; twenty times difference of the vulnerability  
326 for angling between treatments. The experiment showed that the vulnerability for angling is  
327 markedly improved by repeated angling experiences. There are some possibilities for the decline  
328 of angling in large scale experiment. For example, the recapture rate of angled fish decreases if  
329 fish leave the fishery ground [51]. Stålhammar [22] found that the feeding behavior for a prey of  
330 pike was delayed by an angling experience. Meanwhile, angling treatment fish in the present  
331 study were not able to go away from the angling gear in the experiment tank, and had the active  
332 feeding motivation for prey just before the angling test. Thus, it is predicted that the angling  
333 vulnerability was improved by the avoidance learning for angling gear. Re-angling of learned fish  
334 should have occurred less in a natural fishing ground than in a limited space on the present study.  
335 Furthermore, the learning efficiency is often enhanced by the social learning for various contents  
336 [52,53]. Whereas it is not still clear for the social learning of angling gear, if the social learning  
337 for angling gear is established in groups of fish, the invulnerability of angling would be prompt  
338 in natural condition.

339 Animals often have a cognitive ability adapted to their ecology [27,28], and the adaptive  
340 cognition is often prepared innately in them [29]. For example, tropical poeciliid in higher  
341 predation pressure exhibit an innate behavioral character adapted with predatory environment  
342 [54]. Also, hatchery-reared jack mackerel juveniles under rearing condition develops  
343 ontogenetically the learning capability to fit with the habitat shift during life history in nature [55].  
344 The red sea bream juveniles in the present study were hatchery-reared, and thus had never  
345 encountered angling gear in their lives before the experiment. Nevertheless, they demonstrated  
346 the advanced learning capability for angling gear. This suggests that the cognition for angling  
347 gear is innately equipped in the red sea bream juveniles. Red sea bream at the adult stage is  
348 targeted for fishery of pole-and-line fishing and recreational angling in Japan [56]. The juveniles  
349 are released for stock enhancement around Japan to coastal zone and frequently captured by  
350 recreational angling, but forced to release for regulation of angling size by fishery adjustment rule  
351 in each prefecture [57] (see also Kanagawa prefecture Web page,  
352 <http://www.pref.kanagawa.jp/index.html>). It is predicted that they repeatedly encounter angling  
353 gears during the life. The advanced cognition for angling would help them to survive after the  
354 release.

355 In Experiment 2, the juveniles learned angling gear depending on a line attached with a  
356 prey. It is considered that such learning would not be expected in their lives except for angling  
357 process, because a prey with a line would not be present in the natural environment without  
358 angling gear. The avoidance learning in red sea bream might be formed under a cognitive  
359 mechanism specialized in angling. Angling has been a common fishing method since ancient

360 times [1-3], and then fish had been exposed to the risk of angling on their evolution. The cognition  
361 for angling gear might be evolved in red sea bream under the selection for angling. Fishing has  
362 the potential to induce evolutionary change in traits in fish populations [12, 58, 59]. For example,  
363 faster-growing genotypes which may be more vulnerable to fishing depletion were more  
364 frequently harvested than slow-growing fish [60]. In largemouth bass, recreational angling  
365 induced evolutionary changes in various physiological and behavioral traits after only four  
366 generations [61]. The adaptive cognition for angling gear in red sea bream might have occurred  
367 through the natural selection by the angling. The present study suggests the cognitive evolution  
368 for a fishing activity. Whereas the avoidance learning for angling gear is suggested for various  
369 fish species, past studies are limited to the experiment in large scale [13-16]. These studies  
370 focused on only the targeted species for angling, including the present study. It is unclear for the  
371 learning capability of angling in non-targeted species. In future, comparative study between  
372 targeted and non-targeted species would elucidate the cognitive evolution for angling in fishes.

373

374

#### 375 Acknowledgement

376 We thank also students of Maizuru Fisheries Research Station (MFRS) which assisted the  
377 experiment 3.

378

#### 379 Author contribution

380 Experiment and writing paper was conducted by Kohji Takahashi, and the experiment was  
381 directed by Reiji Masuda.

382

#### 383 Fund statement

384 The present study was funded by a grant-in-aid for Japan Society for the Promotion of Science  
385 Fellows and Early-Career Scientists (KAKENHI 18K14512).

386

#### 387 Ethical notes

388 All experiments were performed according to the regulations on animal experimentation of Kyoto  
389 University. A minimum number of fish was used to test the hypothesis. After the experiment, the  
390 fish were donated to local aquarium.

391

392 Conflict of interests. We have no competing interests.

393 Data accessibility. Data have been submitted as electronic supplementary material.

394

#### 395 References

- 396 1. Huse I, Fernö A. 1990 Fish behaviour studies as an aid to improved longline hook design.  
397 *Fish. Res.* 9, 287–297.
- 398 2. O'Connor S, Ono R, Clarkson C. 2011 Pelagic fishing at 42,000 years before the present  
399 and the maritime skills of modern humans. *Science* 334, 1117–1121.
- 400 3. Fujita M, Yamasaki S, Katagiri C, Oshiro I, Sano K, Kurozumi T, Sugawara H, Kunikita  
401 D, Matsuzaki H, Kano A, Okumura T, Sone T, Fujita H, Kobayashi S, Naruse T, Kondo  
402 M, Matsu'ura S, Suwa G, Kaifu Y. 2016. Advanced maritime adaptation in the western  
403 Pacific coastal region extends back to 35,000–30,000 years before present. *Proc. Natl*  
404 *Acad. Sci. USA* 113, 11184–11189.
- 405 4. Nakamura T. 2015 Transition of leisure fishing in Japan inferred from the White Paper  
406 on Leisure. *Nippon Suisan Gakkaishi* 81, 274–282 (in Japanese with English abstract).
- 407 5. Aalbers SA, Stutzer GM, Drawbridge MA. 2004 The effects of catch-and-release angling  
408 on the growth and survival of juvenile white seabass captured on offset circle and J-type  
409 hooks. *Nor. Ame. J Fish. Man.* 24, 793–800.
- 410 6. Bartholomew A, Bohnsack JA. 2005 A review of catch-and-release angling mortality  
411 with implications for no-take reserves. *Rev. Fish Biol. Fish.* 15, 129–154.
- 412 7. Lewin WC, Strehlow HV, Ferter K, Hyder K, Niemax J, Herrmann JP, Weltersbach MS.  
413 2018 Estimating post-release mortality of European sea bass based on experimental  
414 angling. *ICES J Mar. Sci.* 75, 1483–1495.
- 415 8. Danylchuk SE, Danylchuk AJ, Cooke AJ, Goldberg TL, Koppelman J, Philipp DP. 2007  
416 Effects of recreational angling on the post-release behavior and predation of bonefish  
417 (*Albula vulpes*): The role of equilibrium status at the time of release. *J Exp. Mar. Biol.*  
418 *Ecol.* 346, 127–133.
- 419 9. Davis MW, Olla BL, Schreck CB. 2005 Stress induced by hooking, net towing, elevated  
420 sea water temperature and air in sablefish: lack of concordance between mortality and  
421 physiological measures of stress. *J Fish Biol.* 58, 1–15.
- 422 10. Brownscombe JW, Danylchuk AJ, Chapman JA, Gutowsky LFG, Cook SJ. 2017 Best  
423 practices for catch-and-release recreational fisheries-angling tools and tactics. *Fish. Res.*  
424 186, 693–705.
- 425 11. Twardek WM, Shultz AD, Claussen JE, Cooke SJ, Stein JA, Koppelman JB, Phelan FJS,  
426 Philipp DP. 2017 Potential consequences of angling on nest-site fidelity in largemouth  
427 bass. *Env. Biol. Fish* 100, 611–616.
- 428 12. Uusi-Heikkilä S, Wolter C, Klefoth T, Arlinghaus R. 2008 A behavioral perspective on  
429 fishing-induced evolution. *Tren. Ecol. Evol.* 23, 419–421.
- 430 13. Beukema JJ. 1970 Acquired hook-avoidance in the pike *Esox lucius* L. fished with  
431 artificial and natural baits. *J Fish Biol.* 2, 155–160.



- 432 14. Fernö A, Huse I. 1983 The effect of experience on the behaviour of cod (*Gadus morhua*  
433 L.) Towards a baited hook. *Fish. Res.* 2, 19–28.
- 434 15. Klefoth T, Pieterek T, Arlinghaus R. 2013 Impacts of domestication on angling  
435 vulnerability of common carp, *Cyprinus carpio*: the role of learning, foraging behaviour  
436 and food preferences. *Fish. Manag. Ecol.* 20, 174–186.
- 437 16. Lennox RJ, Alós J, Arlinghaus R, Horodysky A, Klefoth T, Monk CT, Cooke SJ. 2017  
438 What makes fish vulnerable to capture by hooks? A conceptual framework and a review  
439 of key determinants. *Fish Fish.* 18, 986–1010.
- 440 17. Young RG, Hayes JW. 2004 Angling pressure and trout catchability: behavioral  
441 observations of brown trout in two New Zealand backcountry rivers. *Nort. Amer. J Fish.*  
442 *Manag.* 24, 1203–1213.
- 443 18. Alós J, Palmer M, Trias P, Diaz-Gil C, Arlinghaus R. 2015 Recreational angling intensity  
444 correlates with alteration of vulnerability to fishing in a carnivorous coastal fish species.  
445 *Can. J Fish. Aqua. Sci.* 72, 217–225.
- 446 19. Colefax A P, Haywood MD, Tibbetts IR. 2016 Effect of angling intensity on feeding  
447 behaviour and community structure of subtropical reef-associated fishes. *Mar. Biol.* 163,  
448 1–14.
- 449 20. Beukema JJ. 1969 Angling experiments with carp (*Cyprinus carpio* L.): I. differences  
450 between wild, domesticated, and hybrid strains. *Neth. J Zool.* 19, 596–609.
- 451 21. Siepker MJ, Ostrand KG, Wahl DH. 2006 Effects of angling on feeding by largemouth  
452 bass. *J Fish Biol.* 69, 783–793.
- 453 22. Stålhammar M, Linderfalk R, Brönmark C, Arlinghaus R, Nilsson PA. 2012 The impact  
454 of catch-and-release on the foraging behaviour of pike (*Esox lucius*) when released alone  
455 or into groups. *Fish. Res.* 125, 51–56.
- 456 23. Takahashi K, Masuda R. 2018 Net-chasing training improves the behavioral  
457 characteristics of hatchery-reared red sea bream (*Pagrus major*) juveniles. *Can. J Fish.*  
458 *Aqua. Sci.* 75, 861–867.
- 459 24. Sneddon LU. 2003. The bold and the shy: individual differences in rainbow trout. *J Fish*  
460 *Biol.* 62, 971–975.
- 461 25. Stoner AW, Ottmar ML. 2004 Fish density and size alter Pacific halibut feeding:  
462 implications for stock assessment. *J Fish Biol.* 64, 1712–1724.
- 463 26. Pfeiffenberger JA, Motta PJ. 2012 The effects of intraspecific competition on the prey  
464 capture behavior and kinematics of the bluegill sunfish, *Lepomis macrochirus*. *Env. Biol.*  
465 *Fish* 93, 13–21.
- 466 27. Healy S, Braithwaite V. 2000 Cognitive ecology: a field of substance? *Tren. Ecol. Evol.*  
467 15, 22–26.

- 468 28. Dukas R, Ratcliffe JM. 2009 *Cognitive Ecology II*. Chicago, The University of Chicago  
469 Press.
- 470 29. Seligman MEP (1970) On the generality of the laws of learning. *Psychol. Rev.* 77, 406–  
471 418.
- 472 30. Wilcoxon HC, Dragoin WB, Kral PA (1971) Illness-induced aversions in rat and quail:  
473 relative salience of visual and gustatory cues. *Science* 171, 826–828.
- 474 31. Odling-Smee L, Braithwaite VA (2003) The influence of habitat stability on landmark  
475 use during spatial learning in the three-spined stickleback. *Anim. Behav.* 65, 701–707.
- 476 32. Girvan JR, Braithwaite VA. 1998 Population differences in spatial learning in three-  
477 spined sticklebacks. *Proc. Roy. Soc. Lond. B Biol.* 265, 913–918.
- 478 33. Douglas B, Martin M, Ben B, Steve W. 2015 Fitting linear mixed-effects models using  
479 lme4. *J Stat. Softw.* 67, 1–48.
- 480 34. Hughes RN, Kaiser MJ, Mackney PA, Warburton K. 1992 Optimizing foraging behaviour  
481 through learning. *J Fish Biol.* 41, 77–91.
- 482 35. Warburton K, Hughes R. 2011 Learning of foraging skills by fish. In *Fish Cognition and*  
483 *Behavior*. Edited by C. Brown, K. Laland, J. Krause. Blackwell Publishing Ltd., UK. 10–  
484 35.
- 485 36. Schuster S, Wöhl S, Griebisch M, Klostermeier I. 2006 Animal cognition: how archer fish  
486 learn to down rapidly moving targets. *Cur. Biol.* 16, 378–383.
- 487 37. Beukema J. J. (1970) Angling experiments with carp (*Cyprinus carpio* L.): II. Decreasing  
488 catchability through one-trial learning. *Neth. J Zool.* 20, 81–92.
- 489 38. Brown C. 2015 Fish intelligence, sentience and ethics. *Anim. Cog.* 18, 1–17.
- 490 39. Patton BW, Braithwaite VA. 2015 Changing tides: ecological and historical perspectives  
491 on fish cognition. *Wiley Interdisciplinary Reviews: Cognitive Science* 6(2):159–76.
- 492 40. Larson JK, McCormick MI. 2005 The role of chemical alarm signals in facilitating learned  
493 recognition of novel chemical cues in a coral reef fish. *Anim. Behav.* 69, 51–57.
- 494 41. Burt de Perera T, Guilford T. 2008 Rapid learning of shelter position in an intertidal fish,  
495 the shanny *Lipophrys pholis* L. *J Fish Biol.* 72, 1386–1392.
- 496 42. Schill DJ, Griffith JS, Gresswell RE. 1986 Hooking mortality of cutthroat trout in a catch-  
497 and-release segment of the Yellowstone River, Yellowstone National Park. *Nor. Amer. J*  
498 *Fish. Manag.* 6, 226–232.
- 499 43. Katano O. 2009 Individual differences in catchability of largemouth bass *Micropterus*  
500 *salmoides* by fishing in an experimental pond. *Nippon Suisan Gakkaishi* 75, 425–431 (in  
501 Japanese with English abstract).
- 502 44. Tsuboi J, Morita K. 2004 Selectivity effects on wild white-spotted charr (*Salvelinus*  
503 *leucomaenis*) during a catch and release fishery. *Fish. Res.* 69, 229–238.



- 504 45. Krebs JR, Healy SD, Shettleworth SJ. 1990 Spatial memory of Paridae: comparison of a  
505 storing and a non-storing species, *Parus ater* and *Parus major*. *Anim. Behav.* 39, 1127–  
506 1137.
- 507 46. Brown GE, Ferrari MCO, Malka PH, Oligny MA, Romano M, Chivers DP. 2011 Growth  
508 rate and retention of learned predator cues by juvenile rainbow trout: faster-growing fish  
509 forget sooner. *Behav. Ecol. Sociobiol.* 65, 1267–1276.
- 510 47. Kaneko S, Masuda R, Yamashita Y. 2018 Memory retention capacity using two different  
511 training methods, appetitive and aversive learning, in juvenile red sea bream *Chrysophrys*  
512 *major*. *J Fish Biol.* 94, 231–240.
- 513 48. Lamb CF, Finger TE. 1995 Gustatory control of feeding behavior in goldfish. *Physiol.*  
514 *Behav.* 57, 483–488.
- 515 49. Crossland MR. 2001 Ability of predatory native Australian fishes to learn to avoid toxic  
516 larvae of the introduced toad *Bufo marinus*. *J Fish Biol.* 59, 319–329.
- 517 50. Garcia J, Koelling RA. 1966 Relation of cue to consequence in avoidance learning.  
518 *Psychon. Sci.* 4, 123–124.
- 519 51. Alós J, Puiggrós A, Díaz-Gil C, Palmer M, Rosselló R, Arlinghaus R. 2015 Empirical  
520 evidence for species-specific export of fish naïveté from a no-take marine protected area  
521 in a coastal recreational hook and line fishery. *PLoS One* 10, e0135348.
- 522 52. Brown C, Laland KN. 2011 Social learning in fishes. In: Brown C, Laland KN, Krause J  
523 (eds) *Fish Cognition and Behaviour*, 2nd edn. Blackwell Publishing Ltd, Chichester, pp  
524 240–257.
- 525 53. Takahashi K, Masuda R, Yamashita Y. 2012 School for learning: sharing and transmission  
526 of feeding information in jack mackerel *Trachurus japonicus* juveniles. *Fish. Sci.* 78,  
527 269–276.
- 528 54. Brown C, Burgess F, Braithwaite VA. 2007 Heritable and experiential effects on boldness  
529 in a tropical poeciliid. *Behav. Ecol. Sociobiol.* 62, 237–243.
- 530 55. Takahashi K, Masuda R, Matsuyama M, Yamashita Y. 2012 Stimulus-specific  
531 development of learning ability during habitat shift in post-recruitment stage jack  
532 mackerel. *J Ethol.* 30, 309–316.
- 533 56. Shishidou H. 2002 Stocking effectiveness of red sea bream, *Pagrus major*, in Kagoshima  
534 Bay, Japan. *Fish. Sci.* 68, 904–907.
- 535 57. Isshiki T. 2013 Fluctuations of annual catch of red sea bream *Pagrus major* by  
536 recreational fishing boats in Kanagawa Prefecture coastal sea area. *Nippon Suisan*  
537 *Gakkaishi* 79, 337–344 (in Japanese with English abstract).
- 538 58. Diaz Pauli B, Sih A. 2017 Behavioural responses to human-induced change: Why fishing  
539 should not be ignored. *Evol. Appl.* 10, 231–240.

- 540 59. Kuparinen A, Merilä J. 2007 Detecting and managing fisheries-induced evolution. *Tren.*  
541 *Ecol. Evol.* 22, 652–659.
- 542 60. Biro PA, Post JR. 2008 Rapid depletion of genotypes with fast growth and bold  
543 personality traits from harvested fish populations. *Proc. Natl. Acad. Sci. USA* 105, 2919–  
544 2922.
- 545 61. Cooke SJ, Suski CD, Ostrand KG, Wahl DH, Philipp DP. 2007 Physiological and  
546 behavioral consequences of long-term artificial selection for vulnerability to recreational  
547 angling in a teleost fish. *Physiol. Biochem. Zool.* 80, 480–490.
- 548
- 549
